# Supplementary material for: Photodegradation of the main synthetic musk (HHCB) in water: kinetic study and influencing factors
Source: Royal Society of Chemistry journal article supplement (doi:10.1039/d4em00351a), 2024-01-01
Supplement: d4em00351a1.pdf [file d4em00351a1.pdf]

## Supplementary Information

### Photodegradation of the main synthetic musk (HHCB) in water: Kinetic study and influencing factors

Hatice Turan<sup>1</sup>, Mathieu Sebilo<sup>2</sup>, Thierry Pigot<sup>1</sup>, Mathilde Monperrus<sup>1\*</sup>

<sup>1</sup>University of Pau and Pays de l'Adour, E2S UPPA, CNRS, IPREM-MIRA, UMR 5254, 64600, Anglet, France

<sup>2</sup>Sorbonne Université, CNRS, INRAE, IRD, UPD, UPEC, Institute of Ecology and Environmental Sciences – Paris, IEES, 75005 Paris, France

**\*Corresponding Author:** Mathilde Monperrus, mathilde.monperrus@univ-pau.fr.

**Keywords :** Galaxolide, Fragrance Ingredients, Environmental Fate, Direct Photolysis, Indirect Photolysis, Reactive Oxygen Species

**Table S 1.** The main physicochemical properties of water samples.

| Parameters                                                  | Riverine  | WWTPs effluent |
|-------------------------------------------------------------|-----------|----------------|
| Colour                                                      | colorless | yellow         |
| T °C                                                        | 12.2      | 13.4           |
| pH                                                          | 7.52      | 7.81           |
| Dissolved Oxygen Concentration (mg L <sup>-1</sup> )        | 8.46      | 10.23          |
| Conductivity (µs cm <sup>-1</sup> )                         | 628       | 1273           |
| Total Organic Carbon (mg L <sup>-1</sup> )                  | 4.87      | 7.92           |
| NO <sub>3</sub> <sup>-</sup> (mg L <sup>-1</sup> )          | 4.05±0.01 | 2.02±0.06      |
| Suspended matter (mg L <sup>-1</sup> )                      | 1.90      | 6.74           |
| Total Alkalinity as CaCO <sub>3</sub> (mg L <sup>-1</sup> ) | 167±6     | 186±4          |
| Chloride (mg L <sup>-1</sup> )                              | 88.3±0.5  | 252.6±4.4      |
| Turbidity (TRB, FNU)                                        | 2.12      | 5.33           |

**Table S 2.** Intensity of irradiance level for Xenon Arc Lamp depending on different range of wavelength.

| Wavelength (nm)        | Irradiance (µW cm <sup>-2</sup> ) |
|------------------------|-----------------------------------|
| UV C (200 - 280 nm)    | 23                                |
| UV B (281 - 315 nm)    | 2                                 |
| UV A (315 - 380 nm)    | 35                                |
| Visible (380 - 780 nm) | 510                               |
| Total (200 - 1100 nm)  | 1573                              |

**Table S 3.** pH measurement of experimental solution (n.d. not determined).

| Matrix                | Experiment                                                         | pH       |      |
|-----------------------|--------------------------------------------------------------------|----------|------|
|                       |                                                                    | Sunlight | UVC  |
| Ultrapure water (UPW) | UPW                                                                | 6.2      | 5.5  |
|                       | Humic Acid                                                         | 6.5      | 5.8  |
|                       | Humic Acid/ISP                                                     | 6.3      | 5.7  |
|                       | Humic Acid/TMP                                                     | 6.8      | 5.7  |
|                       | H <sub>2</sub> O <sub>2</sub>                                      | 6.8      | 5.7  |
|                       | H <sub>2</sub> O <sub>2</sub> /ISP                                 | 6.4      | 5.8  |
|                       | CO <sub>3</sub> <sup>-2</sup>                                      | 11.0     | 11.0 |
|                       | CO <sub>3</sub> <sup>-2</sup> /ISP                                 | 11.0     | 10.9 |
|                       | CO <sub>3</sub> <sup>-2</sup> /H <sub>2</sub> O <sub>2</sub>       | n.d.     | 10.9 |
|                       | CO <sub>3</sub> <sup>-2</sup> /H <sub>2</sub> O <sub>2</sub> - ISP | n.d.     | 11   |
|                       | NO <sub>3</sub> <sup>-</sup>                                       | 6.2      | 5.6  |
|                       | NO <sub>3</sub> <sup>-</sup> /ISP                                  | 6.0      | 5.5  |
|                       | PN                                                                 | 5.5      | 5.5  |
| Riverine water        |                                                                    | 7.5      |      |
| WWTPs effluent water  |                                                                    | 7.8      |      |

**Table S 4.** Analytical performance of GC-MS: linearity ( $R^2$ , coefficient of determination), detection limits (LOD,  $n = 28$ ), quantification limits (LOQ,  $n = 17$ ), precision (RSD,  $n = 10$ ).

|                             | $R^2$  | LOD, $\mu\text{g L}^{-1}$ | LOQ, $\mu\text{g L}^{-1}$ | RSD (%), $34 \mu\text{g L}^{-1}$ | RSD (%), $340 \mu\text{g L}^{-1}$ |
|-----------------------------|--------|---------------------------|---------------------------|----------------------------------|-----------------------------------|
| Galaxolide (HHCB)           | 0.9884 | 0.38                      | 1.26                      | 2                                | 2                                 |
| Galaxolidone (HHCB-Lactone) | 0.9736 | 0.36                      | 1.20                      | 2                                | 3                                 |

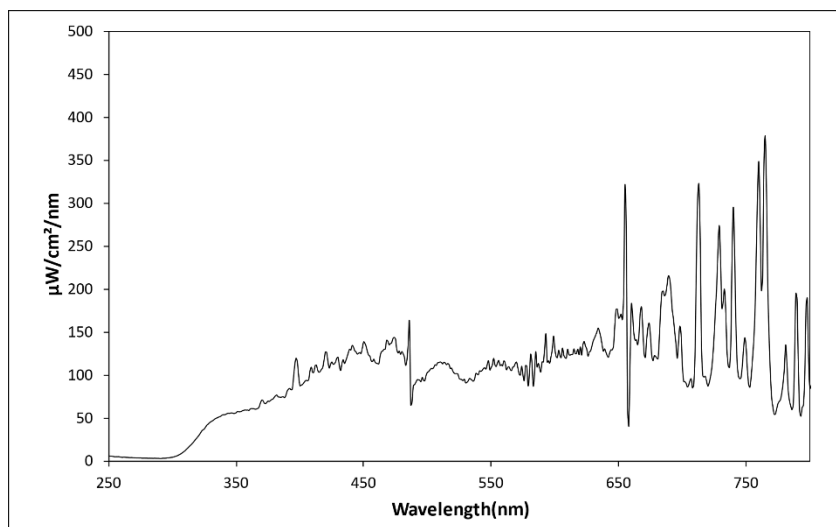

**Fig. S 1.** Absolute light intensity as a function of the wavelength for the Xenon Arc Lamp.

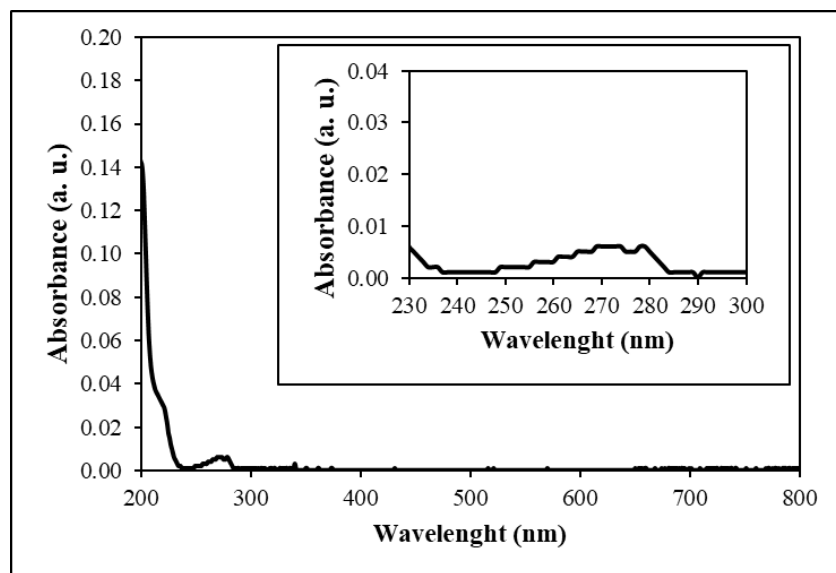

**Fig. S 2.** UV-Vis absorption spectra of HHCB ( $4.42 \mu\text{M}$ ) in ultrapure water (UPW).

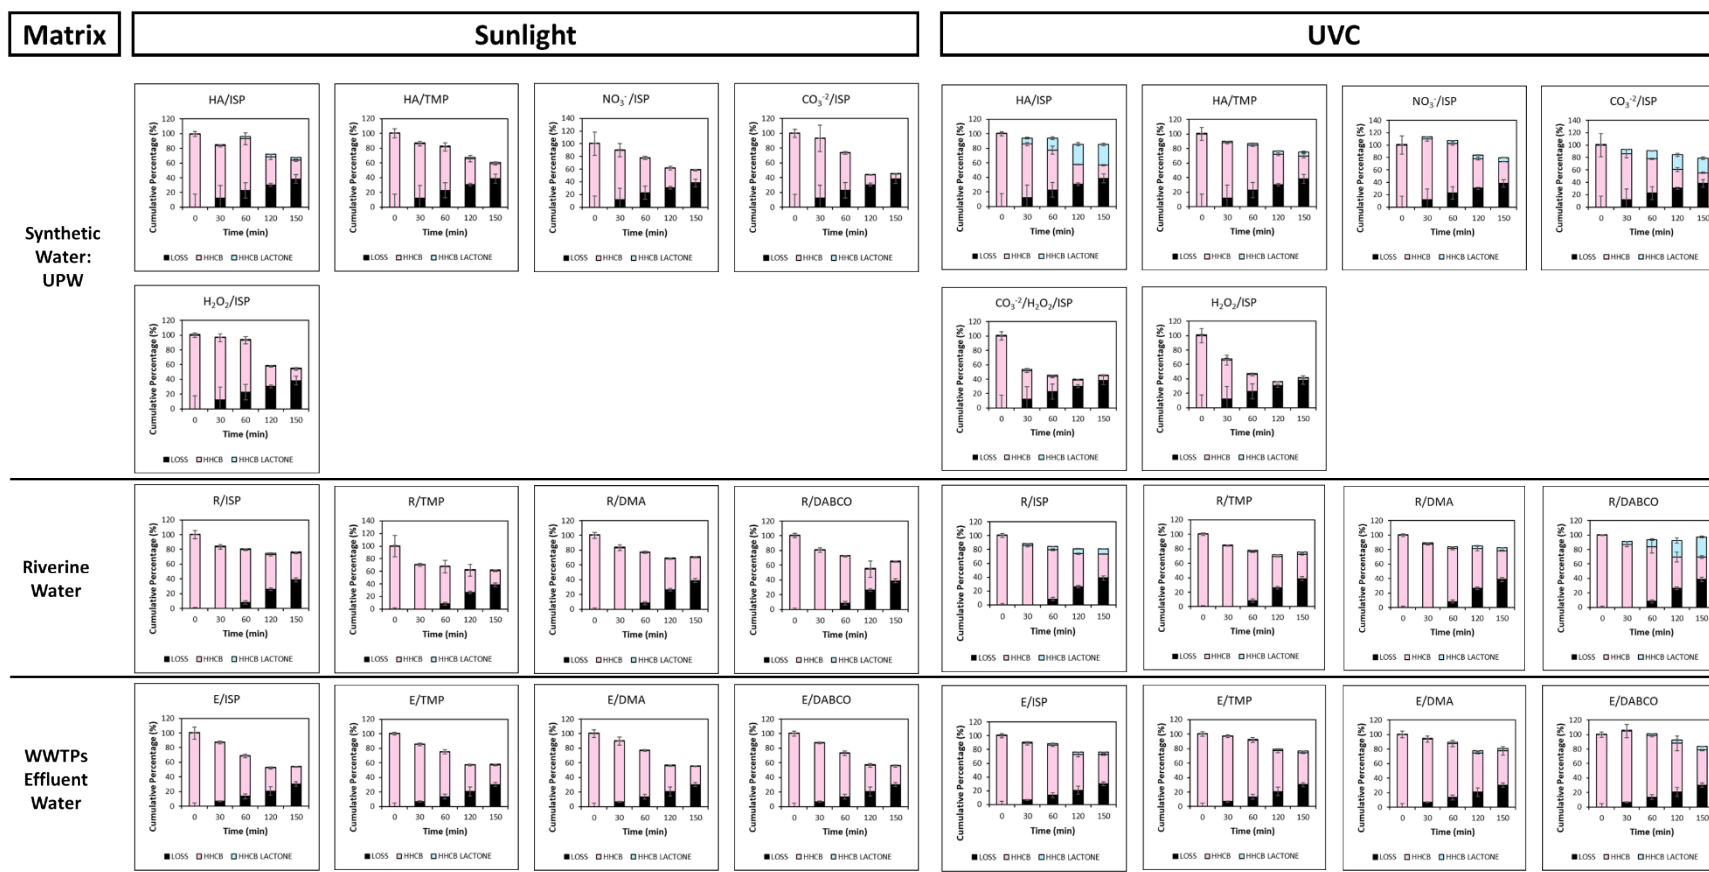

**Fig. S 3.** Mass Balance calculated cumulative HHCB and HHCB Lactone percentage against sunlight and UVC light in the presence of quenchers in ultrapure water (UPW), Riverine water (R), WWTPs Effluent Water (E). LOSS represents the lost percentage of HHCB concentration during dark control experiments in absent of the light based on initial time. Humic acid (HA), 2-Propanol (ISP), 2,3,6-Trimethylphenol (TMP), N, N-dimethylaniline (DMA), 1,4-diazabicyclo [2.2.2] octane (DABCO). Data are mean  $\pm$ SD of 3 replications.

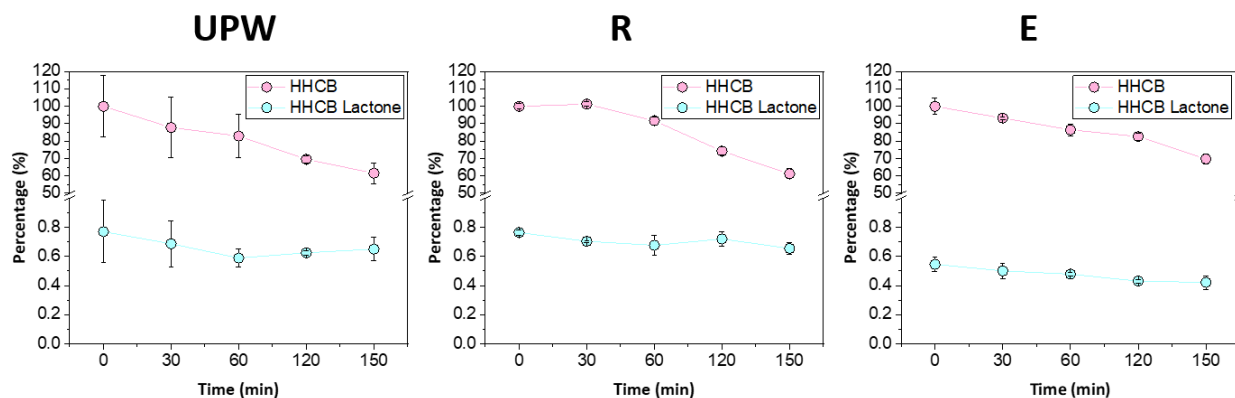

**Fig. S 4.** Percentage of HHCB and HHCB Lactone in the absence of the light (Dark Control) in ultrapure water (UPW), riverine (R) and WWTPs effluents €. Calculated based on initial concentration of HHCB. Data mean  $\pm$ SD of 3 replications.

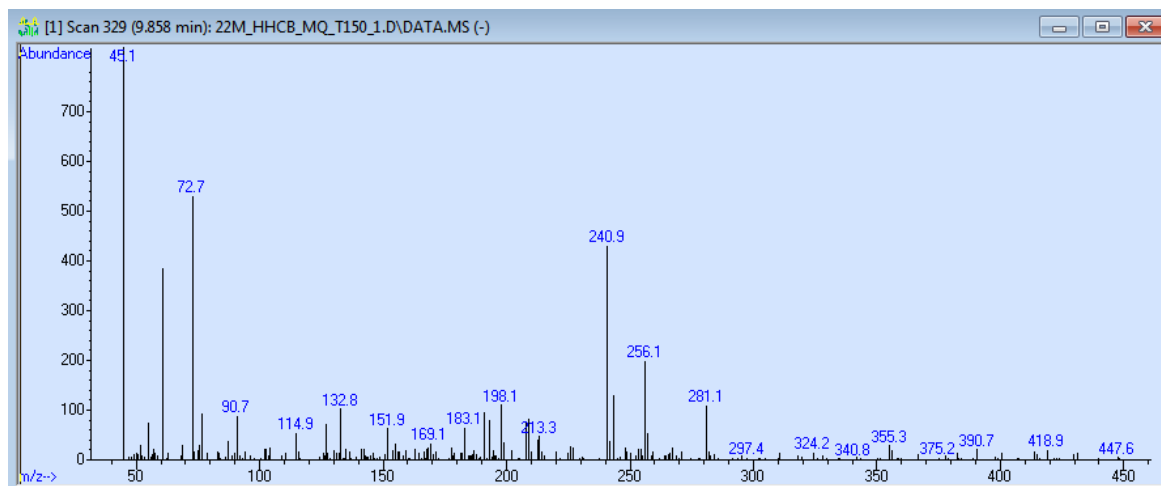

**Fig. S 5.** Mass Spectra of TP-2 for t150<sub>min</sub> (first replication) in ultrapure water (UPW) under UVC.

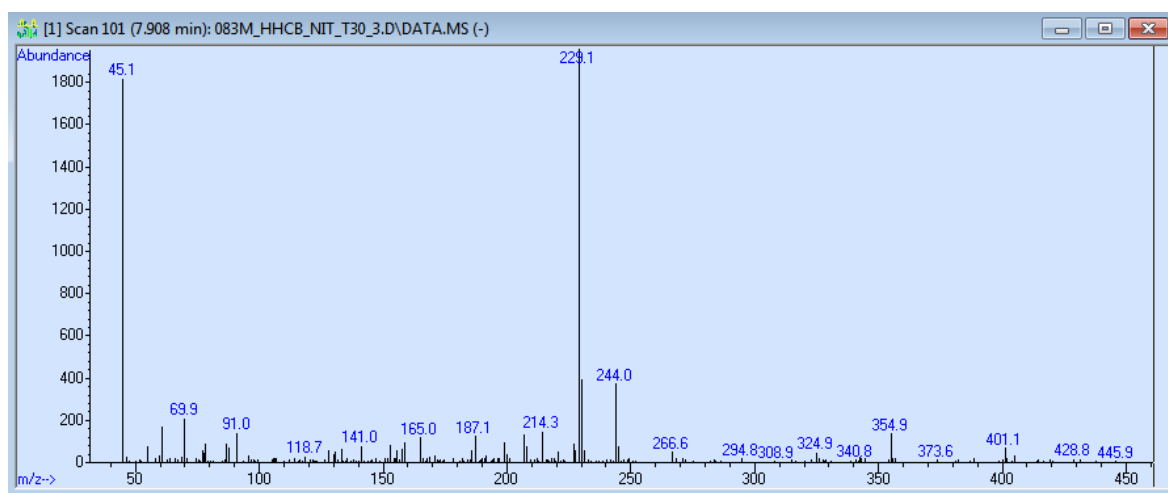

**Fig. S 6.** Mass Spectra of TP-3 for t30<sub>min</sub> (third replication) in ultrapure water (UPW) in the presence of NO<sub>3</sub><sup>-</sup> under UVC.
